# Supplementary figures and images for: Bioactive Evaluation of Ursane-Type Pentacyclic Triterpenoids: β-Boswellic Acid Interferes with the Glycosylation and Transport of Intercellular Adhesion Molecule-1 in Human Lung Adenocarcinoma A549 Cells
Source: MDPI journal article supplement (doi:10.3390/molecules27103073), 2022-05-11

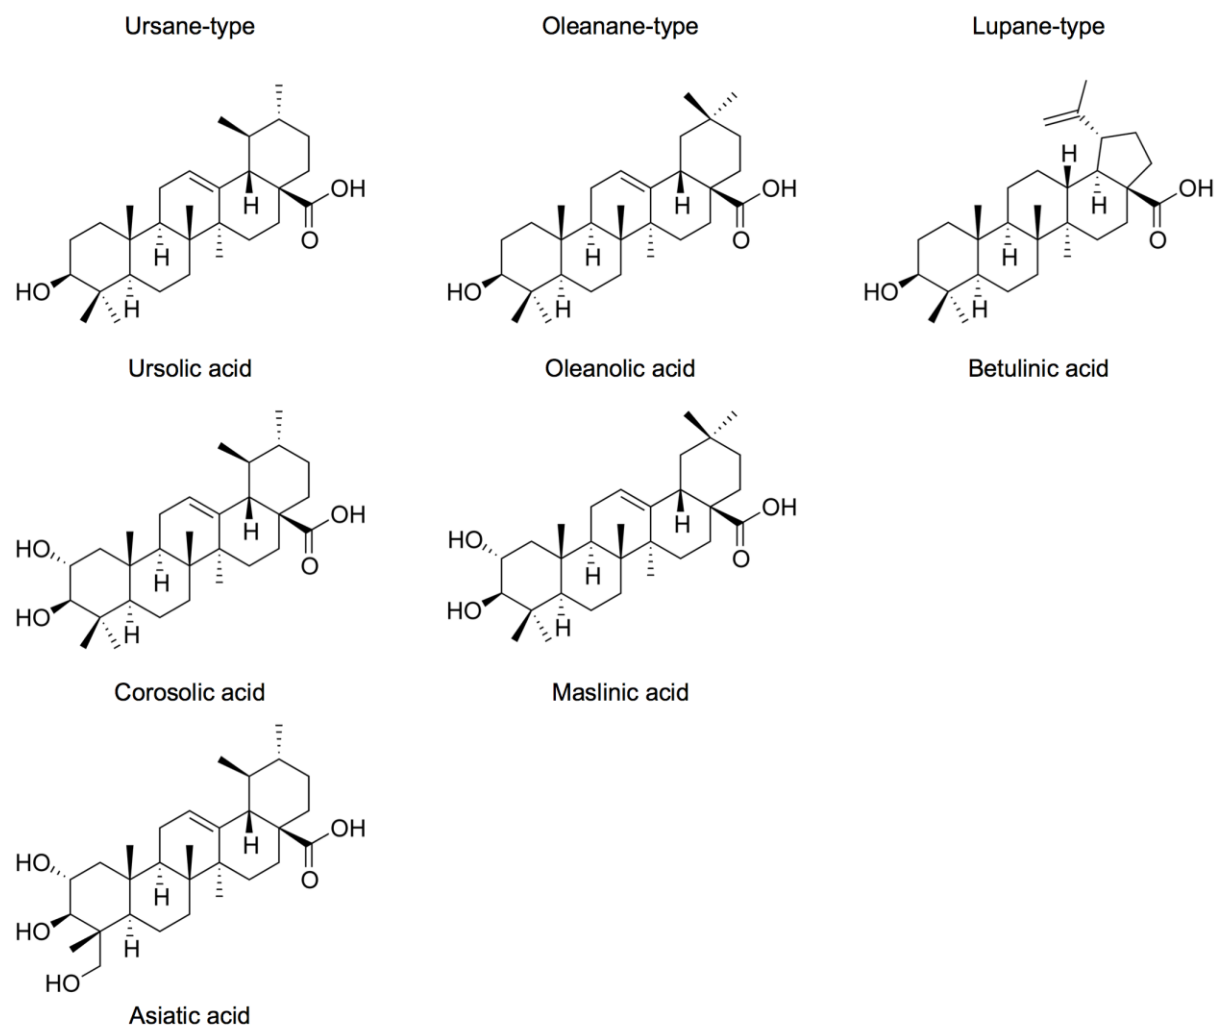

**Figure S1.** Structures of HPTAs.

Supplement: s1 [file s1]
